# Supplementary material
Source: publisher site journal article supplement (http://kjim.org/upload/media/kjim-2021-043-suppl4.pdf)
Supplement: Supplementary file 1 [file kjim-2021-043-suppl4.pdf]

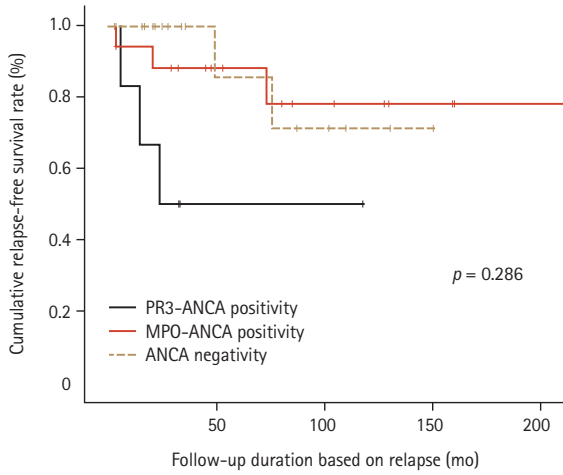

**Supplementary Figure 3.** Comparison of the cumulative relapse-free survival rates among proteinase 3 (PR3)-antineutrophil cytoplasmic antibody (ANCA) positivity, myeloperoxidase (MPO)-ANCA positivity and ANCA negativity.
